# Supplementary material
Source: PubMed Central journal article supplement (PMC3223876)
Supplement: supp_jn.111.148197_nut_148197_SF1.pdf [file supp_jn.111.148197_nut_148197_SF1.pdf]

## Online supporting material

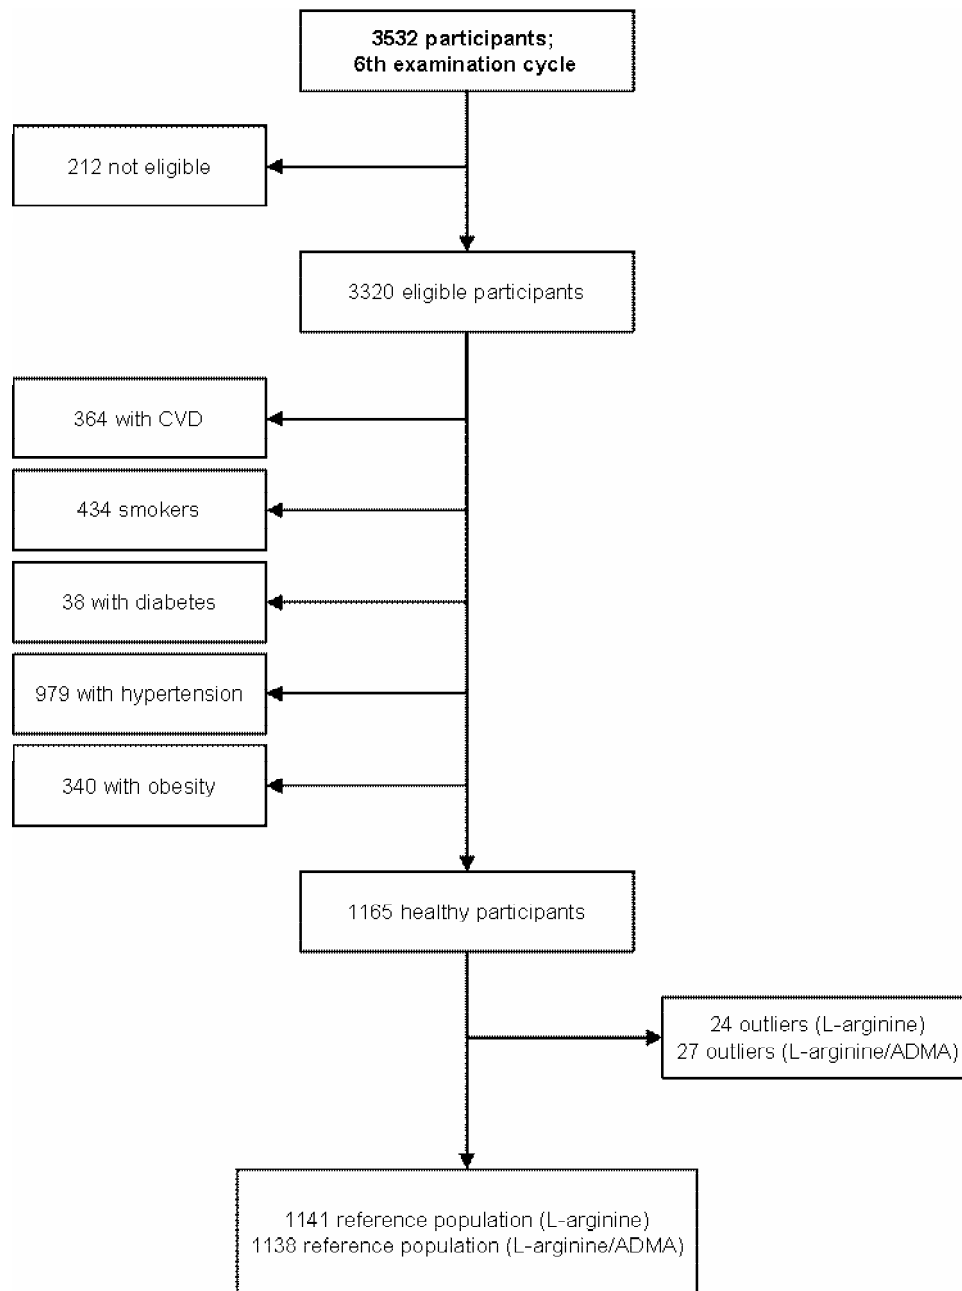

**Supplemental Figure 1:** Study sampling scheme from the Framingham Heart Study, 6<sup>th</sup> examination cycle (1995-1998), offspring cohort. Non-healthy participants were hierarchically excluded from the eligible population to form the reference sample.
